# Supplementary material
Source: PubMed Central journal article supplement (PMC6764772)

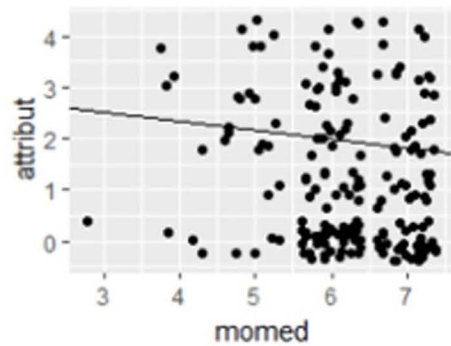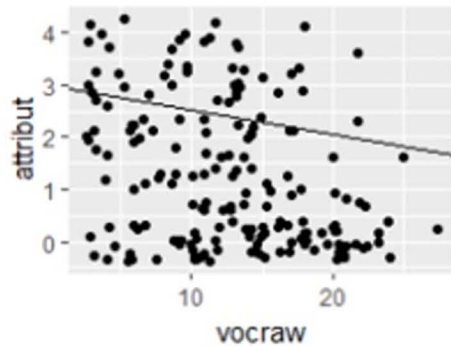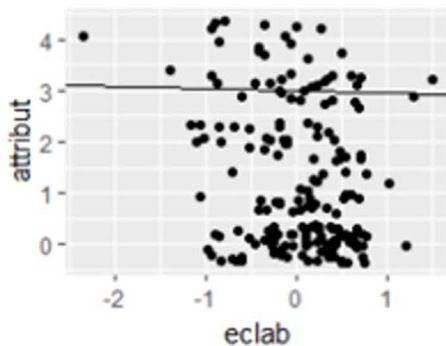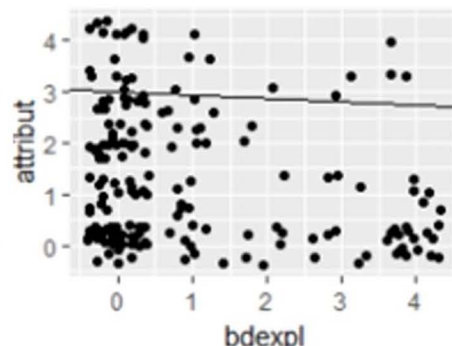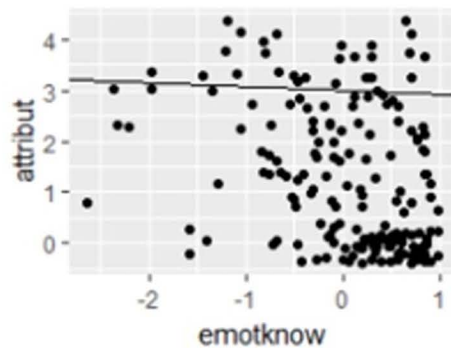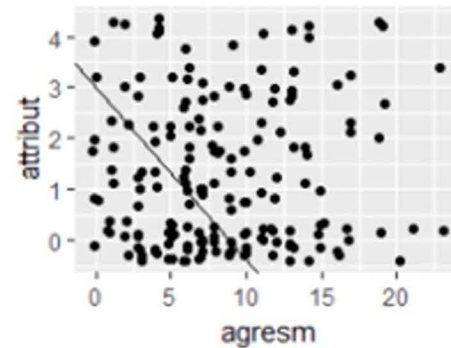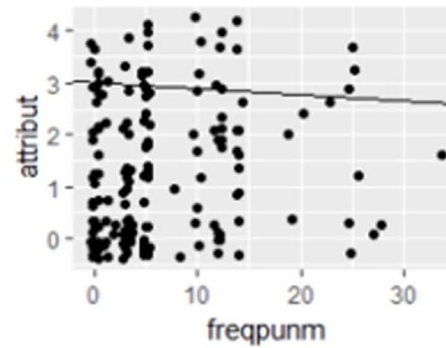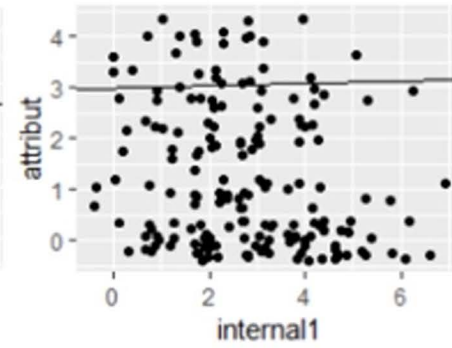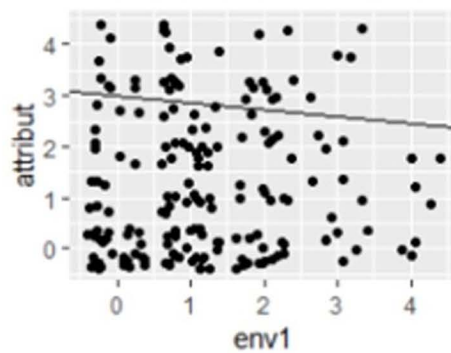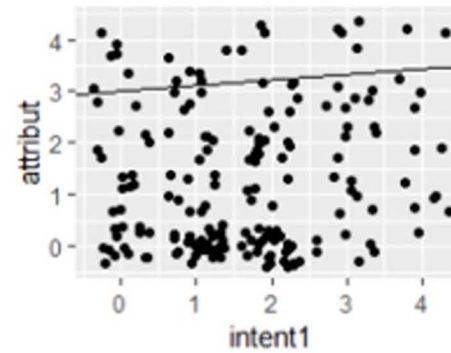

Pearson residuals

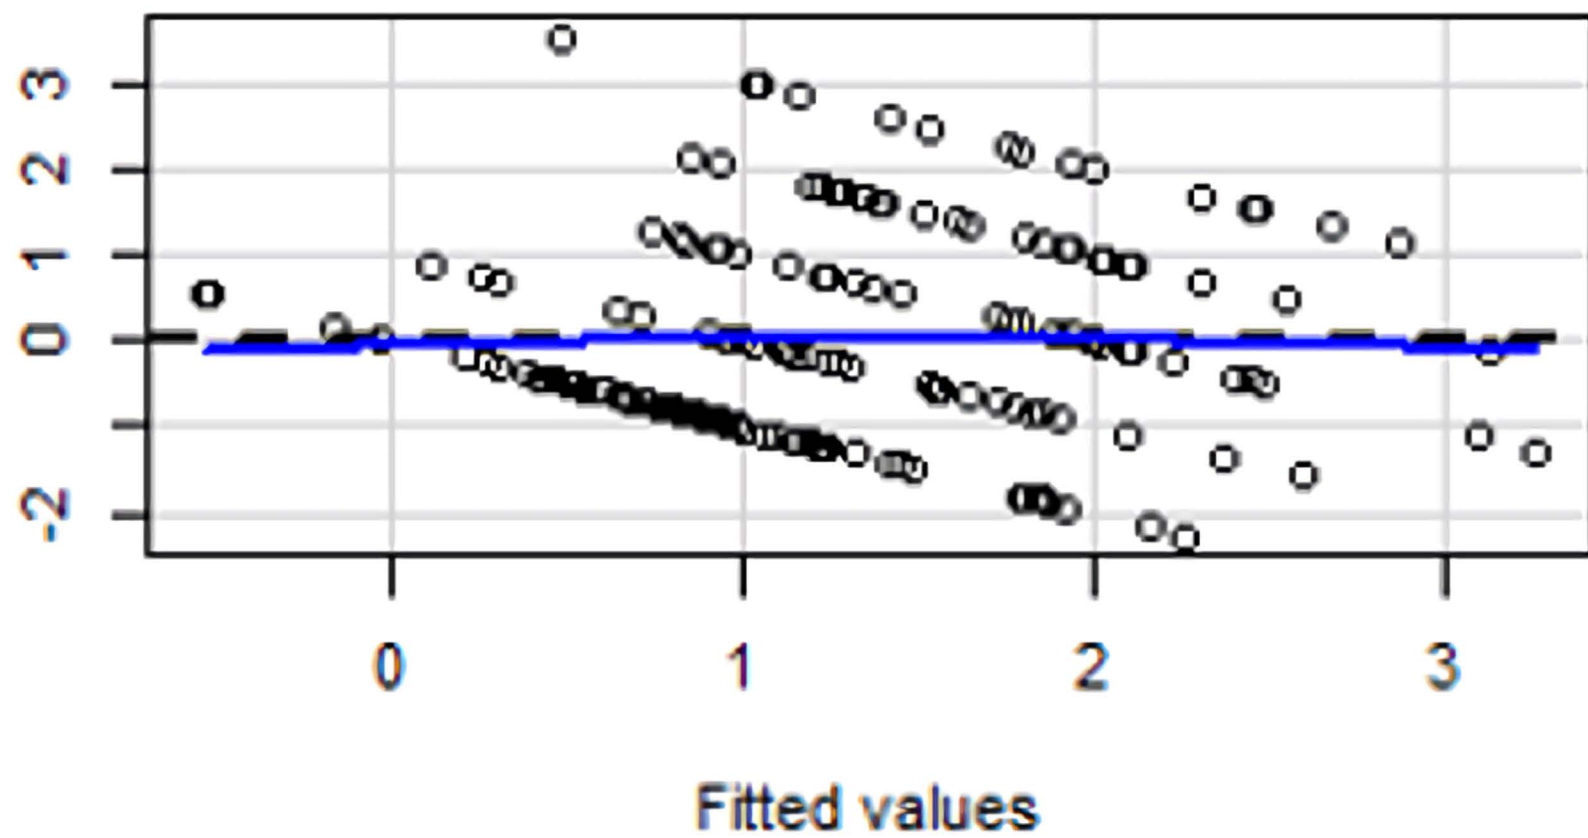

Normal Q-Q

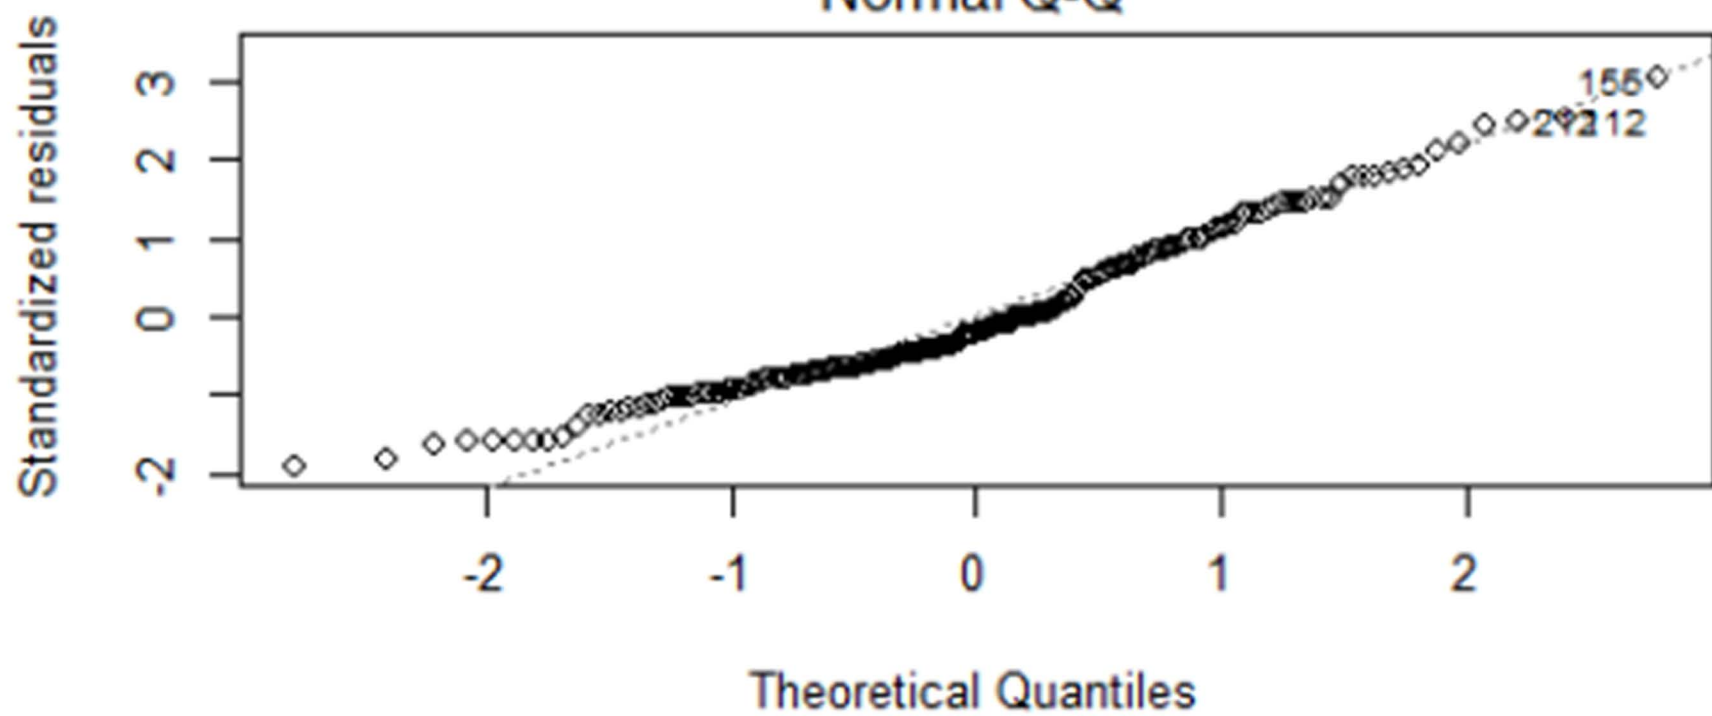

## Distribution of Errors

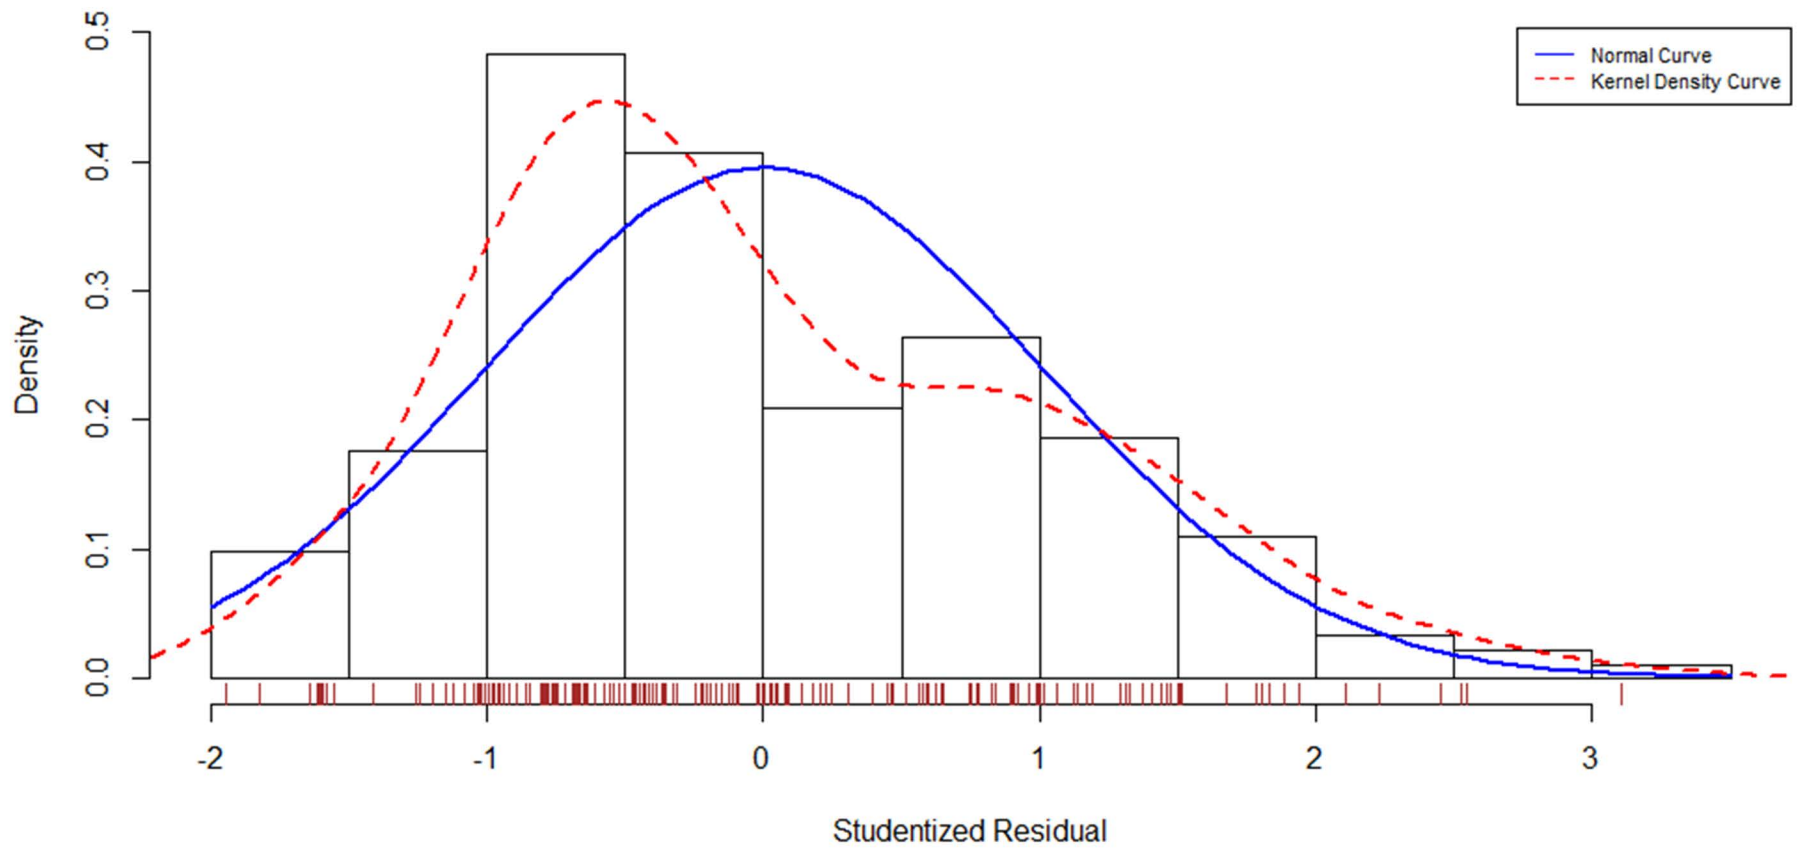

Supplement: NIHMS997253-supplement-Figure_01-3.pdf [file NIHMS997253-supplement-Figure_01-3.pdf]
